# Supplementary material for: Predictors, Mediators and Moderators of Police Work-Related Stress: A Scoping Review
Source: MDPI journal article supplement (doi:10.3390/ijerph20032253), 2023-01-27
Supplement: s1 [file s1]

**Table S1.** Summary of study characteristics and main findings.

| Author details                              | Study design                                                    | Participants'information (N; age; gender; education; marital status; family status; race; rank; tenure; function)                                                                                                                                                                                                                                                                                                                                                                                                                                             | Information of Mediator/Moderator                                                                                                                                               | Outcome                                                    | Location  |
|---------------------------------------------|-----------------------------------------------------------------|---------------------------------------------------------------------------------------------------------------------------------------------------------------------------------------------------------------------------------------------------------------------------------------------------------------------------------------------------------------------------------------------------------------------------------------------------------------------------------------------------------------------------------------------------------------|---------------------------------------------------------------------------------------------------------------------------------------------------------------------------------|------------------------------------------------------------|-----------|
| Wickramasinghe & Wijesinghe (2018)          | Quantitative; cross-sectional; self-administrated questionnaire | N=709; 340 aged 20-24 years (48%), 369 aged 41-60 years (52%), M=39.6 years; 591 males (83.4%), 118 females (16.6%); 401 up to General Certificate of Examination (Advanced Level) (56.6%), 308 General Certificate of Examination (Advanced Level) above (43.4%); 580 married (81.8%), 129 unmarried/other (17.2%); 103 no children (14.5%), 606 at least one child (85.5%); no race information; 87 gazetted officers (12.3%), 622 non-gazetted officers (87.7%); 392 up to 20 years (55.3%), 317 > 20 years (44.7%), M=16.8 years; no function information | Questions related / to socio-demographic factors, basic employment factors, work environment factors, work pattern factors, work support factors, and work satisfaction factors | Burnout subtypes (frenetic, underchallenged, and worn-out) | Sri Lanka |
| McCarty, Aldirawi, Dewald & Palacios (2019) | Quantitative; cross-sectional; online survey                    | N=13,146; 2281 aged 18-35 (17.35%), 2118 aged 36-41 (16.11%), 1925 aged 42-45 (14.64%), 2215 aged 46-50 (16.85%), 1913 aged 51-80                                                                                                                                                                                                                                                                                                                                                                                                                             | Workload / Control Rewards Community Fairness                                                                                                                                   | Burnout (emotional exhaustion and depersonalization)       | US        |

|                                            |                                     |               |                                                                                                                                                                                                                                                                                                                                                                                                                                                          |                                              |         |    |  |
|--------------------------------------------|-------------------------------------|---------------|----------------------------------------------------------------------------------------------------------------------------------------------------------------------------------------------------------------------------------------------------------------------------------------------------------------------------------------------------------------------------------------------------------------------------------------------------------|----------------------------------------------|---------|----|--|
|                                            |                                     |               | (14.55%); 9404 males (71.54%), 1660 females (12.63%); 4921 less than college degree (37.43%), 6331 college degree or above (48.16%); no marital status information; no family status information; 8294 White (63.09%), 911 Black (6.93%), 1002 Latino (7.62%), 578 other (4.4%); 7609 police officer (57.88%), 2279 sergeant (17.34%), 1419 lieutenant or above (10.79%); no tenure information; no function information                                 | The values area of worklife                  |         |    |  |
| Bishopp, Piquero, Worrall & Piquero (2018) | Leeper self-report web-based survey | Quantitative; | N=1,400; 18 aged 20-25 (1.3%), 139 aged 26-30 (9.9%), 182 aged 31-35 (13%), 256 aged 36-40 (18.3%), 297 aged 41-45 (21.2%), 255 aged 46-50 (18.2%), 183 aged 51-55 (13.1%), 70 aged ≥ 56 (5%); 84% males, 16% females; 1 = some college, 2 = bachelor's degree, 3 = graduate degree, M=2.6; no marital status information; no family status information; 60% White, 40% non-White; no rank information; no tenure information; 44% patrol, 56 non-patrol | Environmental strain / Organizational strain | Burnout | US |  |

|                           |                                              |                                                                                                                                                                                                                                                                                                                                                                                                                                                                                                      |                                                                                                                                                                                              |                                |             |
|---------------------------|----------------------------------------------|------------------------------------------------------------------------------------------------------------------------------------------------------------------------------------------------------------------------------------------------------------------------------------------------------------------------------------------------------------------------------------------------------------------------------------------------------------------------------------------------------|----------------------------------------------------------------------------------------------------------------------------------------------------------------------------------------------|--------------------------------|-------------|
| Yun, Hwang & Lynch (2015) | Quantitative; cross-sectional; questionnaire | N=570; 25-60 years, M=46.1 years; 100% males; high school (1)-graduate degree (7), M=2.83; unmarried (0), married (1), M=.93; no family status information; no race information; policeman (1)-captain (5), M=3.19; 0-36 years, M=19.24 years; no function information                                                                                                                                                                                                                               | Poor work / condition<br>Negative police image<br>Authoritative culture<br>Lack of collegiate cooperation<br>Work-family conflict<br>Lack of supervisor support<br>Organizational commitment | Burnout                        | South Korea |
| Ivie & Garland (2011)     | Quantitative; secondary data                 | N=600; no age information; military: 217 males (93.9%), 14 females (6.1%), non-military: 302 males (81.8%), 66 females (17.9%); military: 204 less than bachelor's (88.3%), 27 bachelor's and above (11.7%), non-military: 310 less than bachelor's (84%), 54 bachelor's and above (14.6%); military: 140 married (60.6%), 91 not married (39.4%), non-military: 219 married (59.3%), 148 not married (40.1%); no family status information; military: 146 White (63.2%), 83 non-White (35.9%), non- | Negative / exposures                                                                                                                                                                         | Work-related stress<br>Burnout | US          |

|                                |                                  |                                                                                                                                                                                                                                                                                                                                                                            |                                                                                                                                                             |  |                  |    |
|--------------------------------|----------------------------------|----------------------------------------------------------------------------------------------------------------------------------------------------------------------------------------------------------------------------------------------------------------------------------------------------------------------------------------------------------------------------|-------------------------------------------------------------------------------------------------------------------------------------------------------------|--|------------------|----|
|                                |                                  |                                                                                                                                                                                                                                                                                                                                                                            | <p>military: 213 White (57.7%), 153 non-White (41.5%); no rank information; non-military: M=9.12 years, military: M=9.81 years; no function information</p> |  |                  |    |
| Sayed, Sanford & Kerley (2019) | Qualitative; in-depth interviews | <p>N=20; 27-51 years, M=39.7 years; 17 males (85%), 3 females (15%); 60% at least an undergraduate degree, 20 graduate degree; 65% married, 35% unmarried (single/never married, engaged, or divorced); number of children: 0-4, M=1.75; 10 White (50%), 6 Hispanic (30%), 4 Black (20%); no rank information; 5-25 years, total: 310.5 years; no function information</p> | <p>Different types of / stressors encountered on jobs (organizational factors, danger, monotony and unpredictability, and community and media scrutiny)</p> |  | Workplace stress | US |
| Rose & Unnithan (2015)         | Quantitative; secondary data     | <p>N=1,632; no age information; 87% males, 13% females; 7% high school, 30% some college, 23% associate's degree, 29% bachelor's degree, 6% some graduate school, 4% graduate degree, M=3.10; 72% married, 28% non-married; no family status information; 85% White, 15% non-White; no rank</p>                                                                            | <p>Out-group status / In-group status</p>                                                                                                                   |  | Job stress       | US |

|                                                  |                                                        |                                                                                                                                                                                                                                                                                                                                                                                                                                    |                                                                                                                                                                                               |        |                                                            |        |
|--------------------------------------------------|--------------------------------------------------------|------------------------------------------------------------------------------------------------------------------------------------------------------------------------------------------------------------------------------------------------------------------------------------------------------------------------------------------------------------------------------------------------------------------------------------|-----------------------------------------------------------------------------------------------------------------------------------------------------------------------------------------------|--------|------------------------------------------------------------|--------|
|                                                  |                                                        | information; 0-30 years,<br>M=12.86 years; no function<br>information                                                                                                                                                                                                                                                                                                                                                              |                                                                                                                                                                                               |        |                                                            |        |
| Backteman-Erlanson,<br>Padyab & Brulin<br>(2013) | Quantitative;<br>cross-<br>sectional;<br>questionnaire | N=856; M=37 years, males:<br>M=40 years, females: M=34<br>years; 419 males (53%), 437<br>females (56%); no education<br>information; 670<br>married/living together<br>(78%), 344 males<br>married/living together<br>(83%), 326 females<br>married/living together<br>(75%); no family status<br>information; no race<br>information; no rank<br>information; M=9 years,<br>males: M=12 years, females:<br>M=6 years; 100% patrol | The General /<br>Nordic<br>Questionnaire for<br>and Social Factors<br>at Work<br>Karasek and<br>Theorells demand-<br>control<br>questionnaire<br>The Stress of<br>Conscience<br>Questionnaire |        | Burnout (emotional<br>exhaustion and<br>depersonalization) | Sweden |
| Gächter, Savage &<br>Torgler (2011a)             | Quantitative;<br>secondary<br>data                     | N=1,104; 20-66 years, M=36.04<br>years; 943 males (85.73%), 157<br>females (14.27%); 165 high<br>school (15.08%), 603 some<br>college (55.12%), 285 college<br>(26.05%), 41 graduate school<br>(3.75%); 658 married (59.87%),<br>88 live-in partner (8.01%), 135<br>divorced/separated (12.28%),<br>213 single (19.38%), 5<br>widowed (0.45%); number of<br>children: 0-7, M=1.18; 355                                             | Social capital<br>Individual fairness<br>Institutional<br>fairness<br>Work-life balance<br>Home index<br>Trauma index                                                                         | Gender | Burnout                                                    | US     |

|                                      |                                    |                                                                                                                                                                                                                                                                                                                                                                                                                                                                                                                                                                                                                                                                                                                                                                                                                                                               |                                                                         |   |         |    |
|--------------------------------------|------------------------------------|---------------------------------------------------------------------------------------------------------------------------------------------------------------------------------------------------------------------------------------------------------------------------------------------------------------------------------------------------------------------------------------------------------------------------------------------------------------------------------------------------------------------------------------------------------------------------------------------------------------------------------------------------------------------------------------------------------------------------------------------------------------------------------------------------------------------------------------------------------------|-------------------------------------------------------------------------|---|---------|----|
|                                      |                                    | <p>African-American (32.51%),<br/>         696 Caucasian (63.74%), 14<br/>         Hispanic (1.28%), 27 other<br/>         (2.47%); 91 officer trainee<br/>         (8.27%), 601 officer (54.64%),<br/>         62 agent (5.64%), 144<br/>         detective (13.09%), 143<br/>         sergeant (13%), 59<br/>         lieutenant/above (5.36%); 0-44<br/>         years, M=11.5 years; no<br/>         function information</p>                                                                                                                                                                                                                                                                                                                                                                                                                             |                                                                         |   |         |    |
| Gächter, Savage &<br>Torgler (2011b) | Quantitative;<br>secondary<br>data | <p>N=1,104; 20-66 years, M=36.04<br/>         years; 943 males (85.73%), 157<br/>         females (14.27%); college<br/>         (~26.%), graduate degree<br/>         (~4%); 658 married (59.87%),<br/>         88 live-in partner (8.01%), 135<br/>         divorced/separated (12.28%),<br/>         213 single (19.38%), 5<br/>         widowed (0.45%); number of<br/>         children: 0-7, M=1.18; 355<br/>         African-American (32.51%),<br/>         696 Caucasian (63.74%), 14<br/>         Hispanic (1.28%), 27 other<br/>         (2.47%); 91 officer trainee<br/>         (8.27%), 601 officer (54.64%),<br/>         62 agent (5.64%), 144<br/>         detective (13.09%), 143<br/>         sergeant (13%), 59 lieutenant<br/>         or above (5.36%); 0-44 years,<br/>         M=11.5 years; no function<br/>         information</p> | <p>Social capital<br/>         Home index<br/>         Trauma index</p> | / | Burnout | US |

|                                                               |                                                                         |                                                                                                                                                                                                                                                                                    |                                                                                                                                                         |   |                     |        |
|---------------------------------------------------------------|-------------------------------------------------------------------------|------------------------------------------------------------------------------------------------------------------------------------------------------------------------------------------------------------------------------------------------------------------------------------|---------------------------------------------------------------------------------------------------------------------------------------------------------|---|---------------------|--------|
| Padilla (2020)                                                | Quantitative; cross-sectional; survey                                   | N=147; no age information; males (91%); no education information; no marital status information; no family status information; non-white (55%); patrol (63%); at least 10 years (51%); no function information                                                                     | Gender<br>Race<br>Rank<br>Tenure                                                                                                                        | / | Occupational stress | US     |
| Marcos, Llantada & Pérez-Topa (2019)                          | Quantitative; cross-sectional; online survey                            | N=123; M=39.77 years; 91.9% males; 30.9% university studies, 22.8% combined their work with some kind of studies; no marital status information; 40.7% had a family member in the National Police; no race information; no rank information; M=171 months; no function information | Organizational socialization (history, language, policies, organizational values)<br>Social support<br>Self-efficacy<br>Collective efficacy<br>Optimism | / | Job stress          | Spain  |
| Galanis, Fragkou, Kaitelidou, Kalokairinou & Katsoulas (2019) | Quantitative; cross-sectional; self-completed paper based questionnaire | N=336; M=33.8 years; 256 males (76.2%), 80 females (23.8%); 259 high school graduates (77.1%), 52 university degree (15.5%), 25 MSc/PhD degree (7.4%); 150 married (44.6%), 186 singles/divorced (55.4%); 89 had children < 18 years old (26.5%), 247 did not have children <      | Out of office work/Work in office<br>Sleeping hours per day<br>Days of physical exercise per week<br>Self-estimation of family/friends support          | / | Occupational stress | Greece |

|                                               |                                                 |                                                                                                                                                                                                                                                                                                                                                                                                                                                       |                                                                                                           |                                    |                                                                                                 |       |
|-----------------------------------------------|-------------------------------------------------|-------------------------------------------------------------------------------------------------------------------------------------------------------------------------------------------------------------------------------------------------------------------------------------------------------------------------------------------------------------------------------------------------------------------------------------------------------|-----------------------------------------------------------------------------------------------------------|------------------------------------|-------------------------------------------------------------------------------------------------|-------|
|                                               |                                                 | 18 years old (73.5%); no race information; 273 constables (81.2%), 63 sergeants (18.8%); M=12.7 years; no function information                                                                                                                                                                                                                                                                                                                        |                                                                                                           |                                    |                                                                                                 |       |
| Griffin & Sun (2018)                          | Quantitative; cross-sectional; web-based survey | N=138; 0.73% aged 21-15, 7.97% aged 26-30, 18.8% aged 31-35, 27.5% aged 36-40, 22.5% aged 41-45, 16.7% aged 46-50, 5.8% aged 51-55; 87% males, 13% females; 0.72% high school, 7.25% some college, 15.22% associate degree, 64.49% bachelor degree, 12.32% master degree & above; no marital status information; no family status information; 87% White, 13% non-White; 73.9% corporal or below, 26% supervisor; no tenure information; 54.3% patrol | Demographics                                                                                              | Work-family conflict<br>Resiliency | Burnout                                                                                         | US    |
| Lambert, Qureshi, Frank, Klahm & Smith (2018) | Quantitative; cross-sectional; survey           | N=827; 21-57 years, M=36.53 years; 88% males, 12% females; 42% college degree, 58% no college degree; no marital status information; no family status information; no race information; 69% line officer, 31% other position; 0-                                                                                                                                                                                                                      | Job involvement /<br>Job satisfaction<br>Organizational commitment (affective and continuance commitment) |                                    | Burnout (emotional exhaustion, depersonalization, and reduced sense of personal accomplishment) | India |



|                                 |                                               |                                                                                                                                                                                                                                                                                                                                               |                                                                                                                                                                                                                   |             |       |  |
|---------------------------------|-----------------------------------------------|-----------------------------------------------------------------------------------------------------------------------------------------------------------------------------------------------------------------------------------------------------------------------------------------------------------------------------------------------|-------------------------------------------------------------------------------------------------------------------------------------------------------------------------------------------------------------------|-------------|-------|--|
|                                 |                                               |                                                                                                                                                                                                                                                                                                                                               | 30 years, M=2.44 years; no function information                                                                                                                                                                   |             |       |  |
| Tsai, Nolasco & Vaughn (2018)   | Quantitative; cross-sectional; secondary data | N=594; 22-62 years, M=36.09 years; 515 males (86.7%), 79 females (13.3%); 188 Bachelor & Higher (31.6%), 406 less than Bachelor (68.4%); no marital status information; no family status information; 478 White (80.5%), 116 Minority (19.5%); 248 supervisor (41.8%), 346 officer (58.2%); 0-30 years, M=12.2 years; no function information | Demographics / Negative working environment<br>Counselling support<br>Family discussion with co-workers                                                                                                           | Job stress  | US    |  |
| Frank, Lambert & Qureshi (2017) | Quantitative; cross-sectional; survey         | N=827; 21-57 years, M=36.53 years; 88% males, 12% females; 42% college degree, 58% no college degree; no marital status information; no family status information; no race information; 69% constable, 31% other position; 0-30 years, M=2.44 years; no function information                                                                  | Job demands (role conflict, role ambiguity, role overload, role underload, dangerousness of job)<br>Job resources (input into decision making, formalization, organizational support, instrumental communication) | Work stress | India |  |

|                                               |                                                   |                                                                                                                                                                                                                                                                                  |                                                                                                                                                                        |                    |                                                      |        |
|-----------------------------------------------|---------------------------------------------------|----------------------------------------------------------------------------------------------------------------------------------------------------------------------------------------------------------------------------------------------------------------------------------|------------------------------------------------------------------------------------------------------------------------------------------------------------------------|--------------------|------------------------------------------------------|--------|
| Kula (2017)                                   | Quantitative; cross-sectional; self-report survey | N=538; no age information; 92.6% males; 196 two-year college degrees, 238 bachelor degrees; no marital status information; no family status information; no race information; 407 police officers (75.7%); 158 11-15 years; no function information                              | Organizational Police Stress Questionnaire<br>Operational Police Stress Questionnaire<br>Job Satisfaction Survey<br>Karasek' s Job Content Survey (supervisor support) | Supervisor support | Work-related burnout                                 | Turkey |
| Lambert, Qureshi, Frank, Keena & Hogan (2017) | Quantitative; cross-sectional; self-report survey | N=827; 21-57 years, M=36.53 years; 88% males, 12% females; 42% college degree, 58% no college degree; no marital status information; no family status information; no race information; 69% line officer, 31% other position; 0-39 years, M=13.82 years; no function information | Work family / conflict (strain-based conflict, family-based conflict, behavior-based conflict, time-based conflict)                                                    |                    | Job stress                                           | India  |
| Padyab, Backteman-Erlanson & Brulin (2016)    | Quantitative; cross-sectional; questionnaire      | N=856; M=40 years (males), M=34 years (females); 419 males (53%), 437 females (56%); no education information; no marital status information; no family status information; no race information; no rank                                                                         | Karasek and Theorells questionnaire Job Demand Control-Social Support Model<br>The Stress of Conscience Questionnaire                                                  | /                  | Burnout (emotional exhaustion and depersonalization) | Sweden |

|                                        |                                                        |                                                                                                                                                                                                                                                                                                                                                                                                                                                                                                                                                                                     |                                                                                                     |   |                  |       |
|----------------------------------------|--------------------------------------------------------|-------------------------------------------------------------------------------------------------------------------------------------------------------------------------------------------------------------------------------------------------------------------------------------------------------------------------------------------------------------------------------------------------------------------------------------------------------------------------------------------------------------------------------------------------------------------------------------|-----------------------------------------------------------------------------------------------------|---|------------------|-------|
|                                        |                                                        | information; no tenure<br>information; 100% patrol                                                                                                                                                                                                                                                                                                                                                                                                                                                                                                                                  |                                                                                                     |   |                  |       |
| Rotenberg, Harrison<br>& Reeves (2016) | Quantitative;<br>cross-<br>sectional;<br>online survey | N=183; 22-56 years, M=38<br>years 11 months; 142 males,<br>41 females; no education<br>information; no marital status<br>information; no family status<br>information; no race<br>information; no rank<br>information; no tenure<br>information; no function<br>information                                                                                                                                                                                                                                                                                                         | Personal trust<br>beliefs in the<br>police<br><br>Public-ascribed<br>trust beliefs in the<br>police | / | Workplace stress | UK    |
| Singh & Nayak (2015)                   | Quantitative;<br>self-report<br>questionnaire          | N=599; 65 below 20 years<br>(10.85%), 98 20-29 years<br>(16.36%), 107 30-39 years<br>(17.86%), 230 40-49 years<br>(38.4%), 99 50 years and above<br>(16.53%); 550 males (91.82%),<br>49 females (8.2%); 145 under<br>graduate (24.21%), 356<br>graduate (59.43%), 98 post<br>graduate (16.36%); no marital<br>status information; no family<br>status information; no race<br>information; 100% below<br>inspector level (sub-<br>inspectors, head constables<br>and constables); 90 below 1<br>year (15.03%), 21 1-5 years<br>(3.51%), 399 6-10 years<br>(66.61%), 89 11 years and | Work-family<br>conflict                                                                             | / | Job stress       | India |

|                |                                       |                                                                                                                                                                                                                                                                                                                                                                                                                                                                                                                                                                                                                                                                                                                                                                                                                                                                         |                                                                                                          |                                        |    |
|----------------|---------------------------------------|-------------------------------------------------------------------------------------------------------------------------------------------------------------------------------------------------------------------------------------------------------------------------------------------------------------------------------------------------------------------------------------------------------------------------------------------------------------------------------------------------------------------------------------------------------------------------------------------------------------------------------------------------------------------------------------------------------------------------------------------------------------------------------------------------------------------------------------------------------------------------|----------------------------------------------------------------------------------------------------------|----------------------------------------|----|
|                |                                       | above (14.86%); no function information                                                                                                                                                                                                                                                                                                                                                                                                                                                                                                                                                                                                                                                                                                                                                                                                                                 |                                                                                                          |                                        |    |
| McCarty (2013) | Quantitative; cross-sectional; survey | N=908; no age information; 737 males, 171 females; 536 less than MA (72.7%) (males), 199 MA or above (27%) (males), 108 less than MA (63.2%) (females), 63 MA or above (36.8%) (females); 580 married (78.7%) (males), 154 not married (20.9%) (males), 89 married (52%) (females), 81 not married (47.4%) (females); no family status information; 104 African American (14.1%) (males), 526 White (71.4%) (males), 85 Hispanic (11.5%) (males), 22 Other (3%) (males), 40 African American (23.4%) (females), 110 White (64.3%) (females), 20 Hispanic (11.7%) (females), 1 Other (0.6%) (females); 100% sergeants; 30 6-10 years (4.1%) (males), 199 11-15 years (27%) (males), 211 16-20 years (28.6%) (males), 167 21-25 years (22.7%) (males), 128 26 years or more (17.4%) (males), 12 6-10 years (7%) (females), 29 11-15 years (17%) (females), 61 16-20 years | Views of / subordinates Satisfaction with peers and supervisors Work-life conflict Unfairness Discipline | Emotional exhaustion Depersonalization | US |

|                                             |                                                                          |                                                                                                                                                                                                                                                                                                                                                                                                                                       |                                                                                                                     |   |                       |         |
|---------------------------------------------|--------------------------------------------------------------------------|---------------------------------------------------------------------------------------------------------------------------------------------------------------------------------------------------------------------------------------------------------------------------------------------------------------------------------------------------------------------------------------------------------------------------------------|---------------------------------------------------------------------------------------------------------------------|---|-----------------------|---------|
|                                             |                                                                          |                                                                                                                                                                                                                                                                                                                                                                                                                                       | (35.7%) (females), 46 21-25 years (26.9%) (females), 23 26 years or more (13.5%) (females); no function information |   |                       |         |
| Vuorensyrjä & Mälkiä (2011)                 | Quantitative; cross-sectional; electronic survey                         | N=2,821; 26.3% 20-29 years, 43% 30-39 years, 20.9% 40-49 years, 9.8% 50 years; 82.7% males, 17.3% females; no education information; no marital status information; no family status information; no race information; 100% constable; 10.9% < 2 years, 24.3% 2-5 years, 36.3% 6-15 years, 16.6% 16-25 years, 11.9% > 25 years; 20.3% daily crime investigation, 15.8% demanding crime investigation, 63.8% public order and security | Defective leadership<br>Role conflicts<br>Threat of violence<br>Time pressure<br>Shift work                         | / | Burnout               | Finland |
| Redman, Hamilton, Malloch & Kleymann (2011) | Quantitative; cross-sectional; self-completion paper based questionnaire | N=198; Median= 30-39 years; 66% males, 34% females; no education information; 61% married/living as married, 39% single/divorced/other; no family status information; no race information; 8% inspectors and above, 20% sergeants, 53% constables, 18% others; Median= 10 years                                                                                                                                                       | Hours spent in the workplace building<br>Positive affectivity<br>Sick building syndrome                             | / | Job stress<br>Burnout | US      |

|                             |                                                   |                                                                                                                                                                                                                                                                                                                                                                                                                                                                                               |                                                                                                                                              |              |                                                           |       |
|-----------------------------|---------------------------------------------------|-----------------------------------------------------------------------------------------------------------------------------------------------------------------------------------------------------------------------------------------------------------------------------------------------------------------------------------------------------------------------------------------------------------------------------------------------------------------------------------------------|----------------------------------------------------------------------------------------------------------------------------------------------|--------------|-----------------------------------------------------------|-------|
|                             |                                                   | or more; no function information                                                                                                                                                                                                                                                                                                                                                                                                                                                              |                                                                                                                                              |              |                                                           |       |
| Violanti et al. (2018)      | Quantitative; cross-sectional; self-report survey | N=200; M=46.2 years; 143 males (72%), 57 females (28%); 13 high school/GED (6.5%), 103 college < 4 years (51.5%), 84 college 4+ years (42%); 20 single (10.1%), 137 married (68.8%), 42 divorced (21.1%); no family status information; 162 Caucasian (81%), 38 African American (19%); 110 police officer (55%), 39 sergeant/lieutenant (19.5%), 51 captain/detective (25.5%); 9 0-9 years (4.5%), 45 10-14 years (22.5%), 68 15-19 years (34%), 78 20+ years (39%); no function information | Effort-reward imbalance / Overcommitment                                                                                                     |              | Burnout (cynicism, exhaustion, and professional efficacy) | US    |
| Kumar & Kamalanabhan (2017) | Quantitative; survey                              | N=491; aged 31-39 years (43%); males (81.7%); no education information; no marital status information; no family status information; no race information; sub-inspectors (54.7%); 2 years; no function information                                                                                                                                                                                                                                                                            | Organizational stressors (perceived unfairness, inflexible work hours, work overload and role ambiguity)<br><br>Community stressors (publics | Work support | Burnout                                                   | India |

|                                |                                               |                                                                                                                                                                                                                                                                            |                                                                     |                                               |             |  |        |
|--------------------------------|-----------------------------------------------|----------------------------------------------------------------------------------------------------------------------------------------------------------------------------------------------------------------------------------------------------------------------------|---------------------------------------------------------------------|-----------------------------------------------|-------------|--|--------|
|                                |                                               |                                                                                                                                                                                                                                                                            | negative attitude toward police and political interference)         |                                               |             |  |        |
|                                |                                               |                                                                                                                                                                                                                                                                            | Work-home interface (work-family conflict and family-work conflict) |                                               |             |  |        |
| Smoktunowicz et al. (2015)     | Quantitative; cross-sectional; secondary data | N=607; 21-61 years, M=36.64 years; 483 males (80%), 124 females (20%); no education information; no marital status information; no family status information; no race information; no rank information; 1-36 years, M=12.83 years; no function information                 | Job demands<br>Job control<br>Social support                        | Social support                                | Job burnout |  | Poland |
| Wang, Zheng, Hu & Zheng (2014) | Quantitative; survey                          | N=521; 192 aged 40-50 (36.9%), 162 aged 30-40 (31.1%); 392 males (75.2%); no education information; no marital status information; no family status information; no race information; no rank information; no tenure information; 192 public security (36.4%), 69 criminal | Police job stress                                                   | Locus of control<br>personality (internality) | Job burnout |  | China  |

investigation (13.1%), 51  
office (9.7%)

|                            |                                          |                                                                                                                                                                                                                                                                                                                                                                                      |                                                                                                                                                                                                                                                            |         |    |
|----------------------------|------------------------------------------|--------------------------------------------------------------------------------------------------------------------------------------------------------------------------------------------------------------------------------------------------------------------------------------------------------------------------------------------------------------------------------------|------------------------------------------------------------------------------------------------------------------------------------------------------------------------------------------------------------------------------------------------------------|---------|----|
| McCarty & Skogan<br>(2013) | Quantitative;<br>online<br>questionnaire | N=2,564; no age information;<br>1871 males, 663 females; 1152<br>less than Bachelor's degree,<br>1298 Bachelor's degree or<br>higher; no marital status<br>information; no family status<br>information; 365 African<br>American, 1508 White, 422<br>Hispanic, 197 Others; no rank<br>information; M=12.93 years<br>(civilian), M=17.17 years<br>(sworn); no function<br>information | Job related /<br>(perceptions of<br>danger, work-life<br>conflict, shift<br>assignment work)<br>Organizational<br>(social support<br>from coworkers<br>and supervisors,<br>perceived<br>unfairness of the<br>organization, size<br>of the<br>organization) | Burnout | US |
|----------------------------|------------------------------------------|--------------------------------------------------------------------------------------------------------------------------------------------------------------------------------------------------------------------------------------------------------------------------------------------------------------------------------------------------------------------------------------|------------------------------------------------------------------------------------------------------------------------------------------------------------------------------------------------------------------------------------------------------------|---------|----|

---
